# Supplementary material
Source: PubMed Central journal article supplement (PMC4930681)
Supplement: NIHMS791626-supplement-1.pdf [file NIHMS791626-supplement-1.pdf]

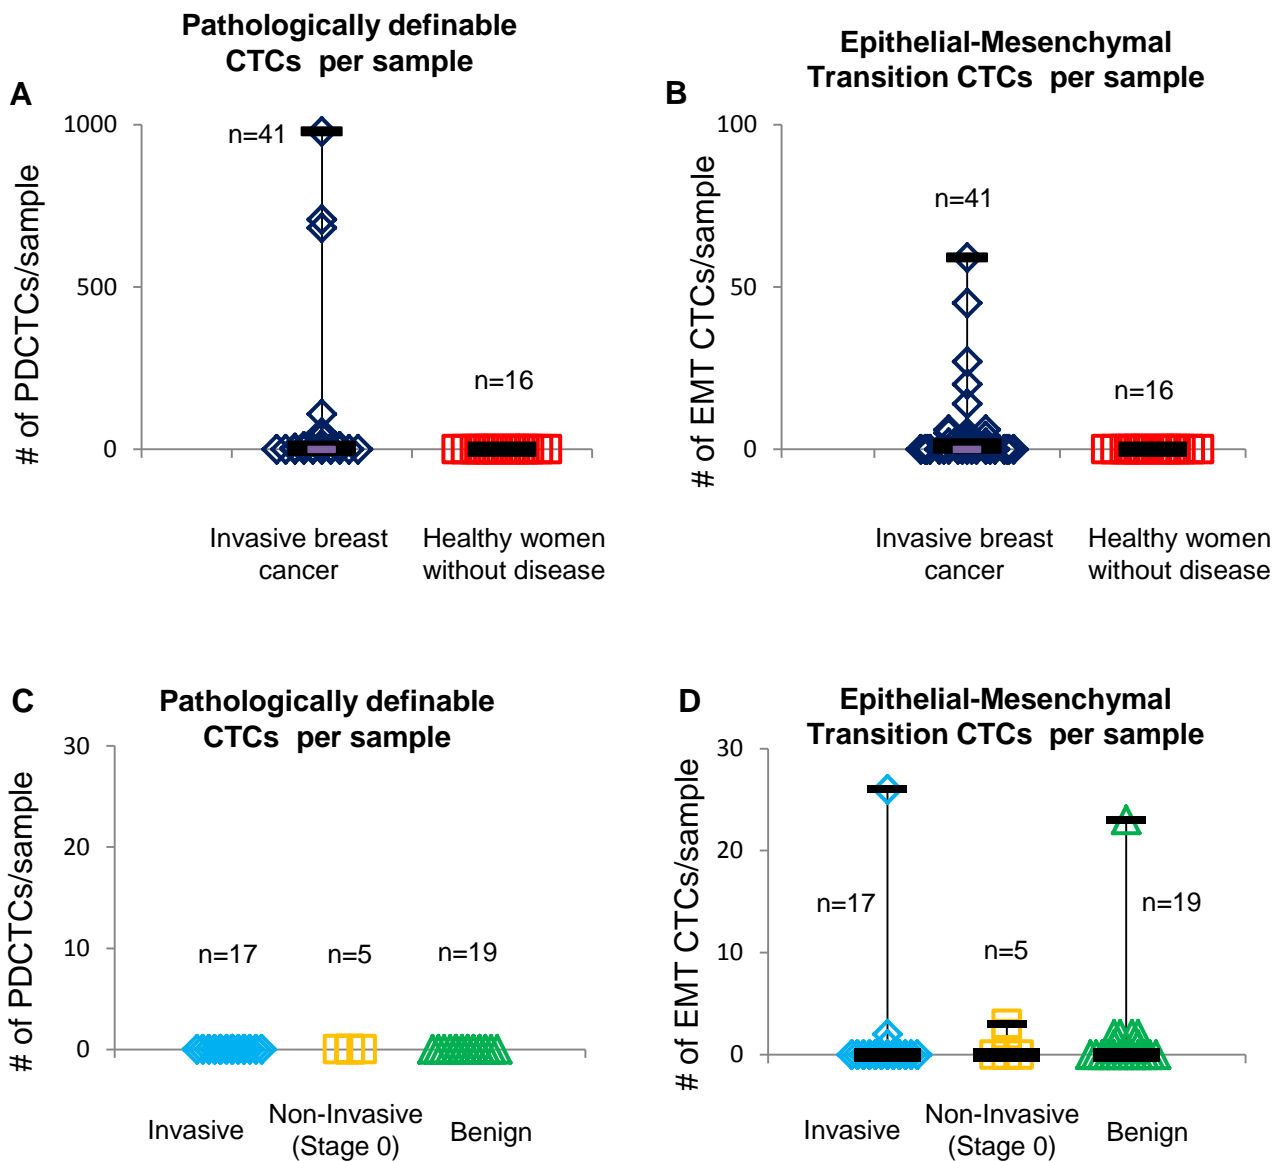

**Supplementary Figure 1. Enumeration of CTC subtypes from Study A and Study B.**

**(A and B ) Study A: Presence, sensitivity and specificity of Pathologically definable CTCs (PDCTCs) or Epithelial-Mesenchymal transition CTCs (EMT CTCs) in patients with known**

**invasive breast cancer versus healthy control volunteers.** PDCTCs were found in 31 of 41 patients

with known invasive breast cancer, but in none of the 16 healthy controls. Sensitivity: 76% (CI95% 60-

88%) Specificity: 100% (CI95% 79-100%) PPV: 100% (CI95% 89-100%) NPV: 62% (CI95% 41-80%).

EMT CTCs were found in 19 of 41 patients with known invasive breast cancer, but in none of the 16

healthy controls. Sensitivity: 54% (CI95% 37-69) Specificity: 100% (CI95% 79-100%) PPV: 100%

(CI95% 85-100%) NPV: 46% (CI95% 29-63%).

**(C and D) Study B: Presence, sensitivity and specificity of PCTCs or EMT CTCs in patients with positive mammograms/CBEs compared to standard pathological assessment .** PDCTCs were not

found in any patient samples from Study B. EMT CTCs were found in 40% (n=2/5) of patients with non-

invasive disease, in 18% (n=3/17) of patients with invasive disease, and 37% (n=7/19) of patients with

benign conditions. Comparing invasive breast cancer (n=17) to benign conditions (n=19). Sensitivity:

18% (CI95% 4-43%) Specificity: 63% (CI95% 38-84%) PPV: 30% (CI95% 7-65%) NPV: 46% (CI95%

27-67%).

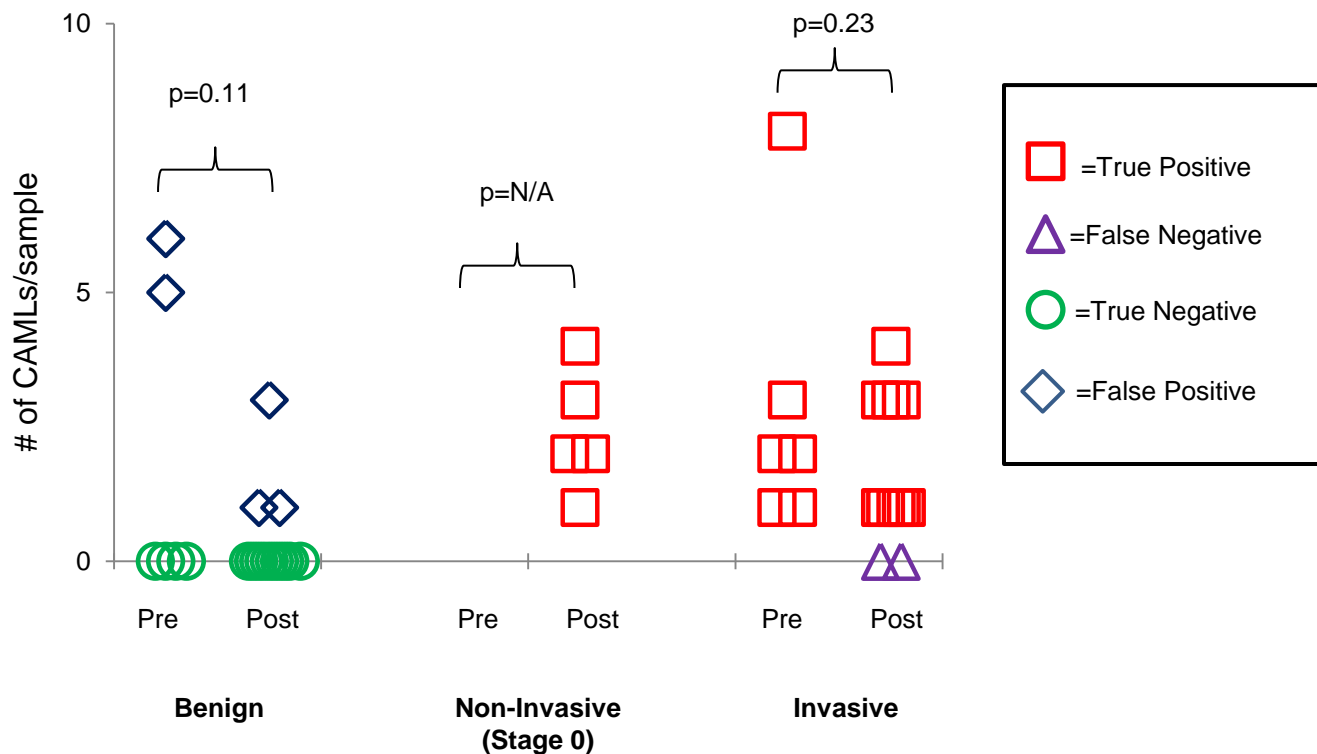

**Supplementary Figure 2. CAML enumeration from blood samples taken pre or post biopsy.** To account for the possibility that presence of CAMLs may be a residual artifact from manipulation caused by the biopsy, thirteen samples were taken prior to biopsy and twenty nine samples taken post biopsy. There were no samples pre-biopsy and 5 post-biopsy in the non-Invasive group; 6 pre-biopsy and 13 post-biopsy in the benign group; and 6 pre-biopsy and 11 post-biopsy in the Invasive group. An unpaired student's T-test was calculated for each grouping, pre versus post. It was determined that there was no significant difference between pre or post biopsy ( $p>0.05$ ) in either the benign or invasive groupings.

**Supplementary Table 1: Cancer patient characteristics from Study A: Patients with known diagnosed breast cancer**

|           |            | Number of patients | % CAML Positive (median) |
|-----------|------------|--------------------|--------------------------|
| Stage     | 1          | -                  |                          |
|           | 2          | 2                  | 100 (44.5)               |
|           | 3          | 13                 | 85 (6)                   |
|           | 4          | 26                 | 96 (9.5)                 |
| ER/PR*    | Positive   | 16                 | 94 (7.5)                 |
|           | Negative   | 20                 | 95 (9.5)                 |
|           | *Unknown   | 5                  | 80 (1)                   |
| HER2*     | Positive   | 12                 | 92 (29.5)                |
|           | Negative   | 24                 | 96 (6.5)                 |
|           | *Unknown   | 5                  | 80 (1)                   |
| Histology | Ductal     | 17                 | 94 (3)                   |
|           | Lobular    | 3                  | 100 (5)                  |
|           | †Other     | 21                 | 90 (22)                  |
| Treatment | On therapy | 28                 | 96 (25.5)                |
|           | No therapy | 13                 | 85 (2)                   |

\* Tissue unavailable for subtyping

† Tissue unavailable for histology assessment, and/or patients with unspecified metastatic breast cancer, and/or patients with cancers other than IDC or ILC.

**Supplementary Table 2: Cancer patient characteristics from Study B: patients with invasive breast cancer**

|                         |          | Number of patients | % CAML Positive<br>(median) |
|-------------------------|----------|--------------------|-----------------------------|
| Stage                   | 1        | 4                  | 50 (0.5)                    |
|                         | 2        | 10                 | 100 (2)                     |
|                         | 3        | 1                  | 100 (4)                     |
|                         | NS       | 2                  | 100 (2)                     |
| Nodal Status            | N0       | 6                  | 84 (1)                      |
|                         | N1       | 8                  | 88 (2)                      |
|                         | Nx       | 3                  | 100 (1)                     |
| Histologic Grade        | 1        | 2                  | 100 (2.5)                   |
|                         | 2        | 11                 | 82 (1)                      |
|                         | 3        | 4                  | 100 (2.5)                   |
| ER                      | Positive | 14                 | 86 (1)                      |
|                         | Negative | 3                  | 100 (3)                     |
| HER2                    | Positive | 3                  | 100 (1)                     |
|                         | Negative | 13                 | 85 (1.5)                    |
| Histology               | Ductal   | 14                 | 86 (1.5)                    |
|                         | Lobular  | 3                  | 100 (1)                     |
| Lymphovascular Invasion |          |                    |                             |
|                         | Present  | 5                  | 80 (1)                      |
|                         | Absent   | 12                 | 92 (1.5)                    |

**Supplementary Table 3: Summary overview of Sensitivity, Specificity, AUC, and 95% confidence intervals for Both Study groups.**

| <b>Study A</b>                              | <b>Sensitivity<br/>(CI95%)</b> | <b>Specificity<br/>(CI95%)</b> | <b>AUC<br/>(CI95%)</b> | <b>PPV<br/>(CI95%)</b> | <b>NPV<br/>(CI95%)</b> |
|---------------------------------------------|--------------------------------|--------------------------------|------------------------|------------------------|------------------------|
| Invasive Breast Cancer vs Healthy Control   | 93%<br>(80-99%)                | 100%<br>(79-100%)              | 0.96<br>(0.91-1.00)    | 100%<br>(91-100%)      | 84%<br>(60-97%)        |
| <b>Study B</b>                              | <b>Sensitivity<br/>(CI95%)</b> | <b>Specificity<br/>(CI95%)</b> | <b>AUC<br/>(CI95%)</b> | <b>PPV<br/>(CI95%)</b> | <b>NPV<br/>(CI95%)</b> |
| Invasive Breast Cancer vs Benign conditions | 88%<br>(64-99%)                | 74%<br>(49-91%)                | 0.78<br>(0.63-0.92)    | 75%<br>(51-91%)        | 88%<br>(62-99%).       |
